# Supplementary material for: Phylogeography of 912 Cherry Accessions Insight into Independent Origins of Fruiting Cherries and Domestication Footprints of Cultivated Chinese Cherry (Prunus pseudocerasus Lindl.)
Source: Plants (Basel). 2023 Jun 9;12(12):2258. doi: 10.3390/plants12122258 (PMC10302293; doi:10.3390/plants12122258)
Supplement: Supplementary file 1 [file plants-12-02258-s001.zip › Supplementary Table S1-S6.xlsx]

## Sheet: Supplementary Table S1
Supplementary Table S1 Summary of sample site, geographic origin, taxonomy, sample size, and identified haplotypes for studied cherry resources.
Number	Population code	Locality	Latitude N/Longitude E	Altitude/m	sample size ITS (cp DNA)	Nuclear haplotype		Chloroplast haplotypes		species
						No. haplotypes	ITS_haplotypes (no. of individuals)	No. haplotypes	Chloro_haplotype (no. of individuals)
Subgen. Cerasus Mill./Sect. Pseudocerasus Koehne
Prunus pseudocerasus Linld. / Cerasus pseudocerasus (Linld.)G.don
1. Cultivated Chinese cherry ( group CC )					331 (331)	7		8
North and East China (subgroup NEC-C)					105 (105)	2		2
1	CZeZ	Houzhai village, Zhengzhou city, Henan province, China	34°38.545′/113°34.501′	203	13 (13)	2	H1(2), H2(11)	1	h1(13)	Prunus pseudocerasus Linld.
2	CLuY	Luoyang city, Henan province, China	34°43.331′/112°18.155′	251	8(8)	2	H1(1), H2(7)	1	h1(8)	Prunus pseudocerasus Linld.
3	CZaZ	Qicun town, Zaozhuang city, Shandong province, China	34°52.648′/117°31.539′	83	9(9)	2	H1(2), H2(7)	1	h1(9)	Prunus pseudocerasus Linld.
4	CTH	Taihe county, Anhui province, China	33°09.652′/115°35.487′	35	9(9)	2	H1(7), H2(2)	1	h1(9)	Prunus pseudocerasus Linld.
5	CXJ	Xianju city, Zhejiang province, China	28°48.856′/120°39.167′	231	8(8)	2	H1(5), H2(3)	1	h1(8)	Prunus pseudocerasus Linld.
6	CZJ	Tongshan town, Zhuji city, Zhejiang province, China	29°45.171′/120°08.139′	45	4(4)	2	H1(1), H2(3)	1	h1(4)	Prunus pseudocerasus Linld.
7	CSY	Xiaying village, Shangyu city, Zhejiang province, China	29°49.393′/121°00.597′	293	6(6)	2	H1(4), H2(2)	1	h1(6)	Prunus pseudocerasus Linld.
8	CNJ	Xuanwuhu, Nanjing city, Jiangsu province, China	32°04.345′/118°47.155′	286	5(5)	1	H1(5)	1	h1(5)	Prunus pseudocerasus Linld.
9	CHaY	Xujiadian village, Haiyang city, Shandong province, China	36°52.515′/121°07.591′	59	3(3)	1	H2(3)	1	h1(3)	Prunus pseudocerasus Linld.
10	CWL	Songbai town, Wulian county, Weifang city, Shandong province, China	35°41.759′/119°17.182′	219	6(6)	1	H2(6)	1	h1(6)	Prunus pseudocerasus Linld.
11	CAQ	Shibuzi town, Anqiu county, Weifang city, Shandong province, China	26°13.294′/119°04.292′	127	9(9)	2	H1(2), H2(7)	1	h1(9)	Prunus pseudocerasus Linld.
12	CCY	Shibu town, Changyi county, Weifang city, Shandong province, China	36°44.888′/119°26.014′	25	4(4)	1	H2(4)	1	h1(4)	Prunus pseudocerasus Linld.
13	CZC	Songlin town, Zhucheng county, Weifang city, Shandong province, China	35°47.125′/119°32.142′	82	6(6)	1	H2(6)	1	h1(6)	Prunus pseudocerasus Linld.
14	CCL	Tangwu town, Changle county, Weifang city, Shandong province, China	36°28.617′/118°48.454′	202	2(2)	1	H2(2)	1	h1(2)	Prunus pseudocerasus Linld.
15	CLQ	Longgang town, Linqu county, Weifang city, Shandong province, China	36°32.406′/118°40.231′	210	2(2)	1	H1(2)	1	h1(2)	Prunus pseudocerasus Linld.
16	CLiY	liguan town, Lanshan district, Linyi city, Shandong province, China	35°19.562′/118°23.138′	101	4(4)	2	H2(4)	2	h1(3), h41(1)	Prunus pseudocerasus Linld.
17	CLaY	Lvgezhuang town, Laiyang city, Shandong province, China	36°51.852′/120°38.585′	119	7(7)	2	h1(4), H2(3)	1	h1(7)	Prunus pseudocerasus Linld.
Longmenshan Fault Zones (subgroup LFZ-C)					110(110)	5		2
18	CPJ	Guangming village, Pujuang county, Chengdu city, Sichuan province, China	30°17.523′/103°31.127′	553	6(6)	2	H1(5), H2(1)	1	h1(6)	Prunus pseudocerasus Linld.
19	CLuD	Chuni Village, Luding ciunty, Sichuan province, China	29°48.360′/102°12.138′	1308	14(14)	1	H1(14)	1	h1(14)	Prunus pseudocerasus Linld.
20	CKD	Kangding city, Ganzi Tibetan autonomous prefecture, Sichuan province, China	30°06.245′/102°02.590′	2147	3(3)	2	H1(2), H2(1)	2	h1(2), h63(1)	Prunus pseudocerasus Linld.
21	CBC	Guixi village/Taolong village, Beichuan county, Sichuan province, China	32°00.124′/104°38.553′ (31°59.304′/104°07.286)	1404(1479)	4(4)	1	H1(4)	1	h1(4)	Prunus pseudocerasus Linld.
22	CQX	Qingxi village, Guangyuan city, Sichuan province, China	32°27.335′/104°48.420′	1264	5(5)	2	H1(4), H14(1)	1	h1(5)	Prunus pseudocerasus Linld.
23	CMS	Danling county, Meishan city, Sichuan province, China	30°04.051′/103°26.138′	675	5(5)	1	H1(5)	1	h1(5)	Prunus pseudocerasus Linld.
24	CYA	Duiyan town, Yaan city, Sichuan province, China	30°34.334′/102°52.982′	1560	18(18)	2	H1(17), H2(1)	1	h1(18)	Prunus pseudocerasus Linld.
25	CEM	Puxing village, Emei county, Sichuan province, China	29°34.698′/103°27.495′	614	3(3)	1	H1(3)	1	h1(3)	Prunus pseudocerasus Linld.
26	CJY	Laojun village, Jianyang city, Sichuan province, China	30°28.643′/104°19.606′	544	6(6)	2	H1(5), H3(1)	1	h1(6)	Prunus pseudocerasus Linld.
27	CHY	Jiuxiang village, Hanyuan county, Yaan city, Sichuan province, China	29°31.731′/102°38.245′	1214	8(8)	3	H1(5), H2(2), H3(1)	1	h1(8)	Prunus pseudocerasus Linld.
28	CSM	Liziping village, Shimian county, Yaan city, Sichuan province, China	28°57.267′/102°27.707′	1931	11(11)	3	H1(8), H2(1), H3(2)	1	h1(11)	Prunus pseudocerasus Linld.
29	CPZ	Xinxing village, Pengzhou city, Sichuan province, China	31°11.988′/103°50.010′	1011	4(4)	2	H1(2), H2(2)	1	h1(4)	Prunus pseudocerasus Linld.
30	CXC	Zhangmu village, Xichang city, Liangshan Yi Autonomous Prefecture, Sichuan province, China	27°58.298′/102°06.927′	1762	8(8)	2	H1(5), H6(3)	1	h1(8)	Prunus pseudocerasus Linld.
31	CDC	Jiaobangou village, Dechang county, Liangshan Yi Autonomous Prefecture, Sichuan province, China	27°25.384′/102°06.467′	1842	4(4)	1	H1(4)	1	h1(4)	Prunus pseudocerasus Linld.
32	CMN	Fuxing town, Mianning County, Liangshan Yi Autonomous Prefecture, Sichuan province, China	28°25.446′/102°08.739′	1845	3(3)	1	H1(3)	1	h1(3)	Prunus pseudocerasus Linld.
33	CMY	Baima village, Miyi county, Panzhihua city, Sichuan province, China	27°00.821′/102°02.739′	2134	5(5)	1	H1(5)	1	h1(5)	Prunus pseudocerasus Linld.
34	CML	Kangwu Moutain, Muli county, Liangshan Yi autonomous prefecture, Sichuan province, China	27°56.254′/108°29.315′	3300	3(3)	1	H1(3)	1	h1(3)	Prunus pseudocerasus Linld.
Yun-Gui Plateau (subgroup YGP-C)					82(82)	5		4
35	CBN	Banan county, Chongqing city, China	29°22.226′/106°34.182′	305	3(3)	2	H1(1), H2(2)	1	h1(3)	Prunus pseudocerasus Linld.
36	CFL	Fuling district, Chongqing city, China	29°41.460′/107°23.0.8′	390	8(8)	2	H1(4), H2(4)	2	h1(3), h76(5)	Prunus pseudocerasus Linld.
37	CYX	Yanhe town, Yuxi city, Yunnan province, China	24°15.545′/102°28.895′	1672	4(4)	2	H1(3), H35(1)	1	h2(4)	Prunus pseudocerasus Linld.
38	CES	Xiaojie town, Eshan Yi Autonomous County, Yunnan province, China	24°08.104′/102°25.266′	1584	3(3)	1	H2(3)	1	h2(3)	Prunus pseudocerasus Linld.
39	CAN	Erjie town, Jinning, Kunming city, Yunnan province, China	24°42.822′/102°27.990′	1771	3(3)	2	H1(2), H2(1)	1	h1(3)	Prunus pseudocerasus Linld.
40	CFM	Chijiu village, Fumin, Kunming city, Yunnan province, China	25°13.046′/102°28.570′	1794	3(3)	1	H2(3)	1	h2(3)	Prunus pseudocerasus Linld.
41	CYiL	Gedian village, Yiliang, Kunming city, Yunnan province, China	24°53.523′/103°11.527′	1716	3(3)	1	H1(3)	1	h1(3)	Prunus pseudocerasus Linld.
42	CZT	Xiaodian village, Ludian county, Zhaotong city, Yunnan province, China	27°11.698′/103°29.299′	1554	5(5)	3	H1(3), H2(1), H4(1)	2	h1(3), h2(2)	Prunus pseudocerasus Linld.
43	CMZ	Mingjiu town, Mengzi city, Honghe Hani and Yi Autonomous Prefecture, Yunnan province, China	23°26.856′/103°38.618′	1834	4(4)	1	H1(4)	1	h1(4)	Prunus pseudocerasus Linld.
44	CGuY	Baihuahu town, Guiyang city, Guizhou province, China	26°35.267′/106°48.184′	1091	7(7)	3	H1(4), H2(2), H4(1)	2	h1(6), h76(1)	Prunus pseudocerasus Linld.
45	CAS	Anshun city, Guizhou province, China	26°15.607′/105°54.603′	1399	5(5)	3	H1(3), H2(1), H3(1)	1	h1(5)	Prunus pseudocerasus Linld.
46	CBJ	Bijie city, Guizhou province, China	27°18.761′/105°19.492′	1500	21(21)	2	H1(3), H2(18)	2	h1(19), h77(2)	Prunus pseudocerasus Linld.
47	CHeZ	Yemachuan town, Hezhang county, Guizhou province, China	27°07.722′/104°50.244′	1411	6(6)	2	H1(1), H2(5)	1	h1(6)	Prunus pseudocerasus Linld.
48	CNY	Weixin town, Nayong county, Guizhou province	27°00.575′/105°11.626′	1524	2(2)	1	H2(2)	1	h1(2)	Prunus pseudocerasus Linld.
49	CZY	Sancha village, Zunyi city, Guizhou province, China	27°29.563′/106°54.323′	925	3(3)	1	H2(3)	1	h1(3)	Prunus pseudocerasus Linld.
50	CWN	Niupeng town, Weining county, Guizhou province	27°05.616′/103°48.910′	2093	2(2)	1	H2(2)	1	h1(2)	Prunus pseudocerasus Linld.
Qinling Mountain (subgroup QLM-C)					34(34)	3		3
51	CHaZ	Hanzhong city, Shaanxi province, China	33°28.023′/107°58.427′	767	3(3)	1	H2(3)	1	h1(3)	Prunus pseudocerasus Linld.
52	CFP	Huangjiawan, Foping county, Shaanxi province, China	33°31.195′/107°58.883′	521	4(4)	2	H1(2), H2(2)	2	h1(3), h48(1)	Prunus pseudocerasus Linld.
53	CXX	Xixiang county, Shaanxi province, China	33°00.031′/107°44.673′	503	5(5)	2	H1(2), H2(3)	1	h1(5)	Prunus pseudocerasus Linld.
54	CSN	Shangnan, Shangluo city, Shaanxi province, China	33°32.467′/110°52.521′	571	4(4)	2	H1(3), H2(1)	2	h1(3), h14(1)	Prunus pseudocerasus Linld.
55	CQL	Qinling mountain, Foping county, Shaanxi province, China	33°43.812′/107°58.393′	1810	5(5)	1	H1(5)	1	h1(5)	Prunus pseudocerasus Linld.
56	CTS	Ganjiasi, Maiji district, Tianshui city, Gansu province, China	34°26.502′/105°56.207′	1212	4(4)	1	H1(4)	1	h1(4)	Prunus pseudocerasus Linld.
	CZFRI	Zhengzhou Fruit Research Institute, Chinese Academy of Agricultural Sciences	/	/	3(3)	1	H1(3)	2	h1(2), h14(1)	Prunus pseudocerasus Linld.
57	CAK	Ankang city, Shaanxi province, China	32°39.481′/109°02.161′	454	6(6)	2	H1(2), H3(4)	1	h1(6)	Prunus pseudocerasus Linld.
2. Wild Chinese cherry (group WC)					204 (204)	8		27
Longmenshan Fault Zones (subgroup LFZ-W)					170(170)	7		19
58	WTL	Taolong Tibetan autonomous village, Beichuan county, Sichuan province, China	31°59.304′/104°07.286′	1479	31(31)	4	H1(14), H2(7), H9(4), H10(6)	9	h1(14), h14(1), h35(1), h53(2), h59(8), h88(1), h90(2), h91(1), h92(1)	Prunus pseudocerasus Linld.
59	WEMM	Baoguosi, Emei mountain, Sichuan province, China	32°39.481′/109°02.161′	454	2(2)	1	H1(2)	1	h1(2)	Prunus pseudocerasus Linld.
60	WQX	Pingshiban mountain, Guangyuan city, Sichuan province, China	32°24.099′/104°50.035′	1285	23(23)	3	H1(12), H2(10), H8(1)	7	h1(4), h6(2), h14(8), h53(4), h59(2), h76(2), h77(1)	Prunus pseudocerasus Linld.
61	WGaY	Dongqiao village, Guangyuan city, Sichuan province, China	32°28.282′/104°50.288′	1614	17(17)	2	H1(10), H2(7)	6	h1(8), h33(1), h35(4), h76(1), h101(1), h102(2)	Prunus pseudocerasus Linld.
62	WSM	Menghuo village, Shimian county, Yaan city, Sichuan province, China	28°57.267′/102°27.707′	1931	15(15)	2	H1(10), H2(5)	2	h1(14), h80(1)	Prunus pseudocerasus Linld.
63	WZGM	Zhougong mountain, Yaan city, Sichuan province, China	30°09.114′/102°98.176′	895	31(31)	4	H1(25), H2(4), H11(1), H12(1)	7	h1(18), h6(5), h9(3), h14(2), h53(1), h59(1), h87(1)	Prunus pseudocerasus Linld.
64	WMS	Danling, Meishan city, Sichuan province, China	30°04.051′/103°26.138′	675	3(3)	1	H1(3)	1	h1(3)	Prunus pseudocerasus Linld.
65	WGX	Guixi village, Beichuan county, Sichuan province, China	32°00.124′/104°38.553′	1404	44(44)	2	H1(29), H2(15)	4	h1(40), h35(1), h53(2), h78(1)	Prunus pseudocerasus Linld.
66	WXC	Anha town, Xichang city, Yi Autonomous Prefecture of Liangshan, Sichuan province, China	32°39.481′/109°02.161′	454	4(4)	1	H6(4)	1	h1(4)	Prunus pseudocerasus Linld.
Yun-Gui Plateau (subgroup YGP-W)					6(6)	2		5
67	WCQ	Shipan village, Pengshui county, Chongqing city, China	29°08.145′/108°12.107′	1068	6(6)	2	H1(4), H2(2)	5	h1(2), h33(1), h34(1), h35(1)h36(1)	Prunus pseudocerasus Linld.
Qinling Mountain (subgroup QLM-W)					28(28)	2
68	WBZ	Bazhong city, Sichuan province, China	31°55.516′/106°29.873′	854	9(9)	1	H1(9)	4	h1(2), h68(3), h91(2), h116(2)	Prunus pseudocerasus Linld.
69	WNG	Nangong mountain, Ankang city, Shaanxi province, China	32°13.113′/109°00.535′	879	14(14)	2	H1(12), H2(2)	5	h1(6), h14(3), h75(2), h103(2), h104(1)	Prunus pseudocerasus Linld.
70	WSN	Shirengou, Shangnan county, Shangluo city, Shaanxi province, China	33°32.467′/110°52.521′	571	5(5)	2	H1(3), H2(2)	3	h1(1), h14(3), h44(1)	Prunus pseudocerasus Linld.
3. European cherries (group EC)					115 (120)	15		17
Prunus avium L. / Cerasus avium (L.) Moench					101 (101)	11		11
	Cultivars	Zhengzhou Fruit Research Institute, Chinese Academy of Agricultural Sciences	/	/	98(98)	11	H13(11), H15(52), H16(5), H17(3), H18(4), H19(2), H21(2), H22(1), H23(4), H24(13), H29(1)	9	h15(64), h17(1), h18(5), h25(14), h26(1), h28(9), h70(2), h72(1), h93(1)	Prunus avium L.
	Wild Individuals	Zhengzhou Fruit Research Institute, Chinese Academy of Agricultural Sciences	/	/	3(3)	2	H15(2), H21(1)	2	h25(2), h29(1)	Prunus avium L.
Prunus cerasus L. / Cerasus vulgaris Mill. and Hybrids					10 (16)	6		7
	Cultivars	Zhengzhou Fruit Research Institute, Chinese Academy of Agricultural Sciences			5(5)	3	H15(2), H17(1), H26(2)	2	h17(2), h73(3)	Prunus cerasus L.
	Hybrids	Zhengzhou Fruit Research Institute, Chinese Academy of Agricultural Sciences	/	/	5 (11)	3	H21(2), H22(1), H25(2)	6	h15(2), h16(4), h17(2), h22(1), h27(1), h32(1)	Hybrids
Prunus mahaleb L. / Cerasus mahaleb (L.) Mill.
	Mahaleb	Zhengzhou Fruit Research Institute, Chinese Academy of Agricultural Sciences	/	/	4 (3)	2	H27(2), H28(2)	2	h23(2), h71(1)	Prunus mahaleb L.
4. Wild Relatives (group RC )					174(174)	33		57
Longmenshan Fault Zones (subgroup LFZ-R)					58(58)	14		18
71	REMM	Emei mountain, Emeishan city, Sichuan province, China	29°34.698′/103°27.495′	614	13(13)	3	H30(9), H31(1), H32(3)	4	h59(8), h68(3), h86(1), h95(1)	Prunus discoidea & Prunus clarofolia Schneid.
72	RJJM	Jiajin mountain, Yaan city, Sichuan province, China	30°48.252′/102°44.183′	3031	10(10)	5	H30(3), H45(4), H46(1), H47(1), H48(1),	4	h53(2), h57(3), h68(4), h69(1)	Prunus crataegifolius Hand. -Mazz. & Prunus trichostoma Koehne & Prunus clarofolia Schneid.
73	RLX	Yongguzhai, Aba Tibetan and qiang autonomous prefecture, sichuan province, China	31°26.257′/103°11.027′	2614	4(4)	1	H45(4)	2	h57(2), h59(2)	Prunus conadenia Koehne
74	RZGM	Zhougong mountain, Yaan city, Sichuan province, China	30°09.165′/102°98.246′	1395	9(9)	4	H1(3), H30(4), H31(1), H40(1)	5	h59(1), h63(1), h79(1), h114(2), h115(4)	Prunus duclouxii Koehne & Prunus stipulacea Maxim. & Prunus clarofolia Schneid.
75	RML	Muli, Liangshan Yi autonomous prefecture, Sichuan province, China	28°12.272′/101°07.997′	2180	22(22)	8	H30(4), H31(6), H32(2), H36(1), H37(2), H38(2), H39(1), H44(4)	9	h1(5), h56(1), h57(6), h58(2), h59(4), h60(1), h61(1), h62(1), h89(1)	Prunus patentipila Hand. -Mazz. & Prunus szechuanica Batal. & Prunus pleiocerasus Koehne
Yun-Gui Plateau (subgroup YGP-R)					79(79)	17		28
76	RLGM	Leigong mountain, Qiandongnan Miao and Dong Autonomous Prefecture, Guizhou province China	26°22.333′/108°11.526′	1633	11(11)	1	H1(11)	2	h1(8), h42(3)	Prunus conradinae Koehne & Prunus stipulacea Maxim.
77	RFJM	Fanjing mountain, Yinjiang city, Guizhou province, China	27°54′51.9″/108°38′24.3″	1416	14(14)	4	H1(7), H41(3), H42(2), H43(2)	6	h1(3), h43(1), h44(6), h45(1), h46(1), h47(2)	Prunus campanulata Maxim & Prunus clarofolia Schneid. & Prunus polytricha Koehne
78	RPD	Puding county, Anshuan city, Guizhou province, China	26°21.351′/105°54.603′	1451	5(5)	2	H2(1), H5(4)	2	h1(4), h13(1)	Prunus conradinae Koehne
79	RZY	Zunyi city, Guizhou province, China	27°43.111′/106°43.663′	1015	3(3)	2	H1(1), H4(2)	2	h1(1), h14(2)	Prunus serrulata Lindl.
80	RSP	Shiping county, Honghe Hani and Yi Autonomous Prefecture, Yunnan province, China	23°51.995′/102°34.442′	1950	9(9)	3	H6(6), H33(2), H34(1)	4	h1(4), h4(1), h5(2), h6(2)	Prunus conradinae Koehne & Prunus campanulata Maxim
81	RGuY	Baihuahu, Guiyang city, Guizhou province, China	26°39.463′/106°31.460′	1200	9(9)	6	H1(2), H2(2), H4(1), H5(1), H6(1), H7(2)	6	h1(4), h12(1), h14(1), h41(1), h74(1), h75(1)	Prunus conradinae Koehne & Prunus duclouxii Koehne& Prunus pusilliflora Card.
82	RMZ	Mengzi city, Honghe Hani and Yi Autonomous Prefecture, Yunnan province, China	23°26.856′/103°38.618′	1834	2(2)	1	H5(2)	1	h81(2)	Prunus henryi Schneid.
	KIB-CAS	Kunming Institute of Botany, Kunming city, Yunnan province, China	/	/	19(19)	3	H5(8), H6(9), H53(2)	7	h1(9), h7(3), h8(1), h9(1), h10(1), h37(3), h94(1)	Prunus conradinae Koehne & Prunus cerasoides D. Don Sok. & Prunus clarofolia Schneid.
83	RKY	Erjie town, Jinning, Kunming city, Yunnan province, China	24°42.822′/102°27.990′	1771	4(4)	3	H20(1), H49(2), H50(1)	3	h5(1), h11(2), h59(1)	Prunus conradinae Koehne
84	RYX	Yanhe town, Yuxi city, Yunnan province, China	24°15.545′/102°28.895′	1672	3(3)	2	H51(2), H52(1)	3	h3(1), h98(1), h100(1)	Prunus cerasoides D. Don Sok.
Qinling Mountain (subgroup QLM-R)					37(37)	6		15
85	RQLM	Qinling mountain, Foping county, Shaanxi province, China	33°43.789′/107°58.373′	1800	24(24)	3	H1(22), H2(1), H3(1)	12	h1(2), h24(1), h49(1), h50(1), h51(4), h52(1), h53(4), h54(1), h55(6), h99(1), h105(1), h106(1)	Prunus duclouxii Koehne & Prunus stipulacea Maxim. & Prunus clarofolia Schneid.
86	RGLD	Heihe, Liangdang county, longnan city, Gansu province, China	33°55.256′/106°22.081′	1411	13(13)	5	H1(8), H3(1), H46(1), H54(2), H55(1)	6	h53(1), h108(2), h109(5), h110(1), h111(1), h112(2), h113(1)	Prunus szechuanica Batal. & Prunus stipulacea Maxim.& Prunus polytricha Koehne
Subgen. Microcerasus(Koehne) Yü et Li / Sect. Microcerasus Koehne (group MC)
					79 (79)	14		16
Prunus tomentosa Thunb. / Cerasus tomentosa (Thunb.) Wall. / Prunus cinerascens Franch.					48(48)	9		8
87	MDX	Gaofeng village, Dingxi city, Gansu province, China	35°28.556′/104°21.587′	2342	13(13)	5	H56(6), H57(1), H58(3), H59(2), H63(1)	6	h19(1), h30(7), h64(1), h65(1), h66(1), h67(2)	Prunus tomentosa Thunb.
88	MPL	Ankou town, Pingliang city, Gansu province, China	35°13.532′/106°47.391′	1283	11(11)	3	H56(6), H58(3), H59(2)	2	h19(9), h67(2)	Prunus tomentosa Thunb.
89	MTS	Maiji, Tianshui city, Gansu province, China	34°34.55.4′/105°41.55.2′	1189	3(3)	2	H60(1), H61(2)	1	h30(3)	Prunus tomentosa Thunb.
90	MZZ	Shifo town, Zhengzhou city, Henan province, China	34°46.554′/113°35.034′	113	6(6)	3	H58(1), H60(4), H62(1)	2	h19(4), h21(2)	Prunus tomentosa Thunb.
91	MXJ	Shuimogou, Wulumuqi city, Xinjiang Uygur Autonomous Region, China	43°49.450′/87°39.358′	851	4(4)	2	H60(1), H62(3)	2	h19(3), h21(1)	Prunus tomentosa Thunb.
92	MSD	liguan town, Lanshan district, Linyi city, Shandong province, China	35°19.562′/118°23.138′	101	4(4)	3	H58(1), H60(1), H62(2)	2	h21(3), h31(1)	Prunus tomentosa Thunb.
93	MGLD	Heihe, Liangdang county, longnan city, Gansu province, China	33°55.256′/106°22.081′	1411	4(4)	2	H56(2), H59(2)	1	h19(4)	Prunus tomentosa Thunb.
94	MLD	Dugong Village, Luding county, Sichuan province, China	29°47.049′/102°18.559′	2412	3(3)	1	H64(3)	1	h30(3)	Prunus tomentosa Thunb.
Prunus tianshanica Pojark. / Cerasus tianshanica Pojark.					26(26)	2		4
95	MTS-d	Daxigou village, Tianshan mountain, Huocheng county, Ili Kazak Autonomous Prefecture, Xinjiang Uygur Autonomous Region, China	44°23.307′/80°51.127′	2342	12(12)	1	H65(12)	3	h82(9), h83(2), h84(1)	Prunus tianshanica Pojark.
96	MTS-h	Heishantou, Yining county, Ili Kazak Autonomous Prefecture, Xinjiang Uygur Autonomous Region, China	43°37.352′/82°07.423′	1342	14(14)	1	H66(14)	3	h82(7), h84(4), h85(3)	Prunus tianshanica Pojark.
Prunus japonica Thunb. var. salicifolia Kom. / Cerasus humilis (Bge.) Sok.
	MOL	Zhengzhou Fruit Research Institute, Chinese Academy of Agricultural Sciences	/	/	3(3)	1	H67(3)	2	h20(2), h38(1)	Prunus japonica Thunb. var. salicifolia Kom.
Prunus japonica Ser. var. glandulosa Kom. / Cerasus glandulosa (Thunb.) Lois.
	MMAL	Zhengzhou Fruit Research Institute, Chinese Academy of Agricultural Sciences	/	/	2(2)	2	H68(1), H69(1)	2	h39(1), h40(1)	Prunus japonica Ser. var. glandulosa Kom.
6. Out group (OUT)
					4 (3)	2		3
OUT1 Prunus serotina L. / Padus racemosa (Lam.) Gilib		ZFRI	/	/	3 (0)	1	H70(3)			Prunus serotina L.
OUT2 Prunus hypoleuca Koehne / Maddenia hypoleuca Koehne		Qinling mountain, Foping county, Shaanxi province, China	33°43.789′/107°58.373′	1800	1 (0)	1	H71(1)			Prunus hypoleuca Koehne
OUT3 Prunus kansuensis Rehd. / Amygdalus kansuensis (Rehd.) Skeels		NCBI (KF990036)	/	/	0 (1)		/	1	h96(1)	Prunus kansuensis Rehd.
OUT4 Prunus persica (L.) Batsch / Amygdalus persica L.		NCBI (HQ336405)	/	/	0 (1)		/	1	h97(1)	Prunus persica (L.) Batsch
OUT5 Prunus mume Sieb / Armeniaca mume Sieb		NCBI (KF265450)	/	/	0 (1)		/	1	h107(1)	Prunus mume Sieb

## Sheet: Supplementary Table S2
Supplementary Table S3 Distance matrix of pairwise Fst values among five lineages of cherry specimens (Cerasus) calculated by nuclear ITS sequence.
Genetic lineages	I (CC+WC+RC)	III (RC)	II (EC)	IV (EC)	V (MC)
I (CC+WC+RC)	0
III (RC)	0.7828	0
II (EC)	0.819	0.8371	0
IV (EC)	0.8974	0.8246	0.9324	0
V (MC)	0.8864	0.6838	0.8208	0.708	0
All P value << 0.01.

## Sheet: Supplementary Table S3
Supplementary Table S4 Distance matrix of pairwise Fst values among seven lineages of cherry specimens (Cerasus) calculated by chloroplast sequence.
Lineages	I (CC+WC+RC)	II (CC+WC+RC)	V (RC)	III (EC)	IV (EC)	VI (EC)	VII (MC)
I (CC+WC+RC)	0
II (CC+WC+RC)	0.7068	0
V (RC)	0.6886	0.428	0
III (EC)	0.8302	0.8091	0.623	0
IV (EC)	0.7988	0.7561	0.667	0.838	0
VI (EC)	0.8154	0.8186	0.5684	0.7691	0.836	0
VII (MC)	0.8123	0.7198	0.6252	0.7094	0.7804	0.6492	0
All P value << 0.01.

## Sheet: Supplementary Table S4
Table S5 The Demographic and mutation parameters estiamted using approximate Bayesian computation for scenario 6.
Parameter	mean	median	mode	q025	q975
N1 (CC+WC+RC)	43900	41800	35400	14200	87100
N2 (EC)	1610	923	2230	437	6760
N3 (MC)	37300	33500	30800	31800	56500
NA(CC+WC+RC+EC)	69900	71600	75900	34700	96300
NB(CC+WC+RC+EC+MC)	87900	90200	91400	62200	98700
T1	3520000	3420000	3220000	896000	6500000
T2	7	5670000	5990000	1330000	9740000
µ	1.85e-05	1.71e-05	1.5e-05	1.08e-05	3.47e-05
p	0.533	0.533	0.437	0.187	0.885
N1: effective size of CC+WC+RC; N2: effective size of EC; N3: effective size of MC; NA: effective size of CC+WC+RC+EC;NB: effective size of CC+WC+RC+EC+MC; T1: the divergent time of the second differentiation event; T2: The divergent time of the first differentiation event; μ: mean nucleotide mutation rate; P: mean coefficient P; All posterior distributions are estimated with the median and bound…

## Sheet: Supplementary Table S5
Table S6 The Demographic and mutation parameters estiamted using approximate Bayesian computation for scenario 9.
Parameter	mean	median	mode	q025	q975
N1 (RC)	37500	37600	28600	4950	82800
N2 (WC)	5890	6050	5690	1050	9740
N3 (CC)	1530	1150	1080	1180	5550
T1	2660	2390	1824	1180	5540
T2	34200	33101	30502	13100	97600
µ	0.0003934	0.000369	0.000202	0.00927	0.00057
p	0.533	0.533	0.437	0.187	0.885
N1: effective size of RC; N2: effective size of WC; N3: effective size of C; T1: the divergent time of the second differentiation event; T2: The divergent time of the first differentiation event; μ: mean nucleotide mutation rate; P: mean coefficient P; All posterior distributions are estimated with the median and boundaries of the q025 and q975.

## Sheet: Supplementary Table S6
Supplementary Table S2 Information of chloroplast and nuclear DNA fragments.
Fragment name	Primer sequence (5'-3')	Types	Site
trnQ-rps16	F: GCGTGGCCAAGYGGTAAGGC	Intergenic spacer region	Large single copy
	R: GTTGCTTTYTACCCTCACATCGTTT
trnL-trnF	F: CGAAATCGGTAGACGCTACG	Intergenic spacer region	Large single copy
	R: ATTTGAACTGGTGACACGAG
rpl16	F: GCTATGCTTAGTGTGTGACTCGTTG	Intron	Large single copy
	R: CGTACCCATATTTTTCCACCACGAC
ITS	ITS4: TCCTCCGCTATATGATATGC	Internal transcribed spacer	Nuclear ribosomal DNA
	ITS5: GGAAGTAAAAGTCGTAACAAGG
